# Supplementary material for: YOLOv5-PD: A Model for Common Asphalt Pavement Defects Detection
Source: Hindawi journal article supplement (doi:10.1155/2022/7530361), 2022-11-29
Supplement: f1 [file 7530361.f1.docx]

Datasets：https://biankatpas.github.io/Cracks-and-Potholes-in-Road-Images-Dataset/
